# Supplementary material for: Combination of a Bioceramic Scaffold and Simvastatin Nanoparticles as a Synthetic Alternative to Autologous Bone Grafting
Source: Int J Mol Sci. 2018 Dec 18;19(12):4099. doi: 10.3390/ijms19124099 (PMC6321089; doi:10.3390/ijms19124099)
Supplement: Supplementary file 1 [file ijms-19-04099-s001.pdf]

## Supporting information

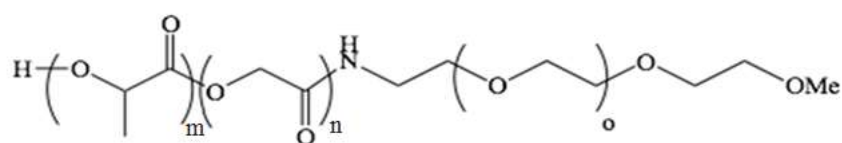

**PP: PLGA-PEG copolymer**

(a)

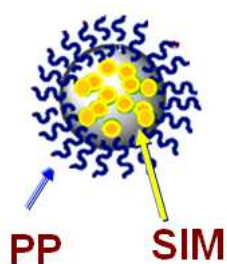

(b1)

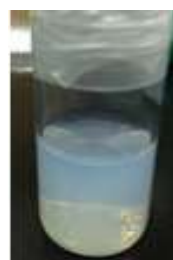

(b2)

**Figure S1.** The methoxy-functionalized diblock copolymer of PLGA-PEG-methoxy (PP) was synthesized by conjugating the heterofunctional PEG with a terminal amine and carboxylic acid functional group to PLGA-COOH using standard *N,N'*-dicyclohexylcarbodiimide (DCC)-mediated chemistry (a). The simvastatin (SIM) agent was encapsulated in PLGA-PEG-methoxy nanoparticles to form SIM-PP NPs by the precipitation-solvent evaporation technique (b1,b2).

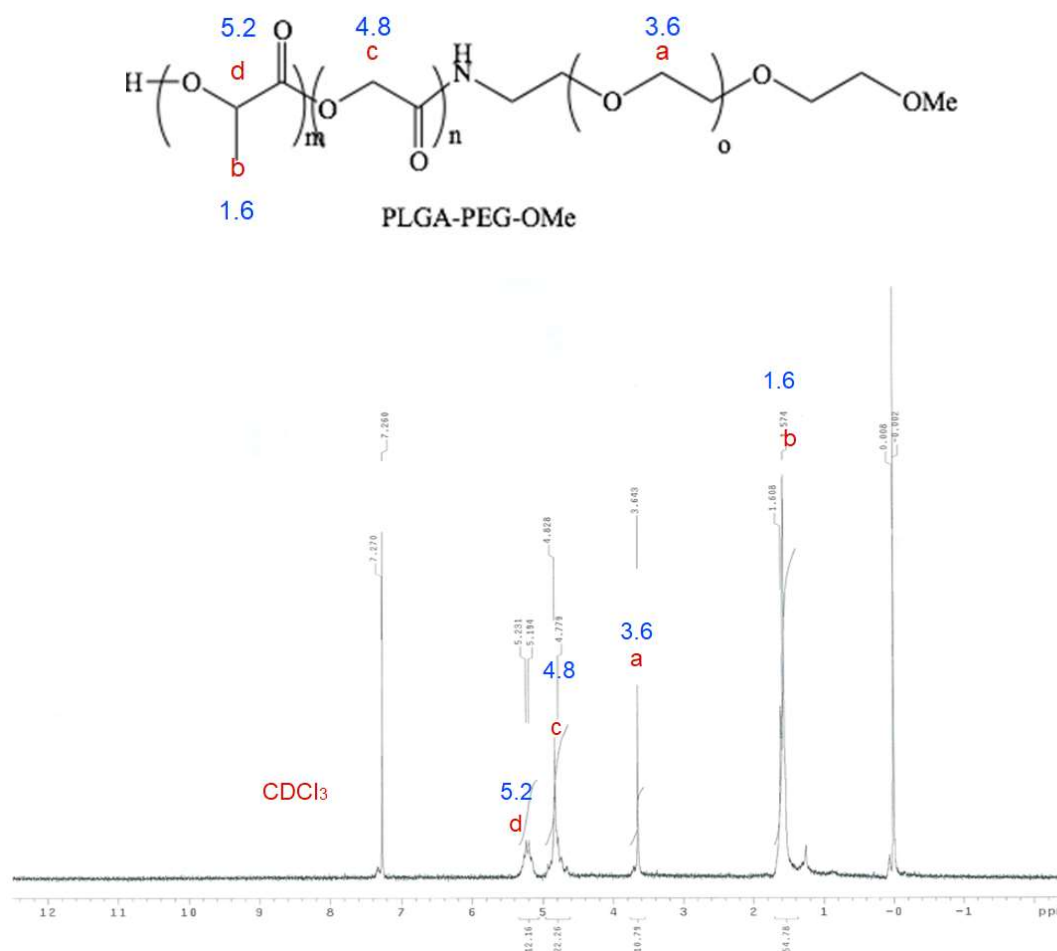

**Figure S2.**  $^1\text{H}$  NMR spectrum confirms to the PLGA-PEG-OMe structure.  $^1\text{H}$  NMR (CDCl<sub>3</sub>, 200 MHz) d:  $\delta$ 5.219(m, 11H), c:  $\delta$ 4.667-4.817(m, 22H), b:  $\delta$ 3.641(s, 1H), a:  $\delta$ 1.562(m, 33H).

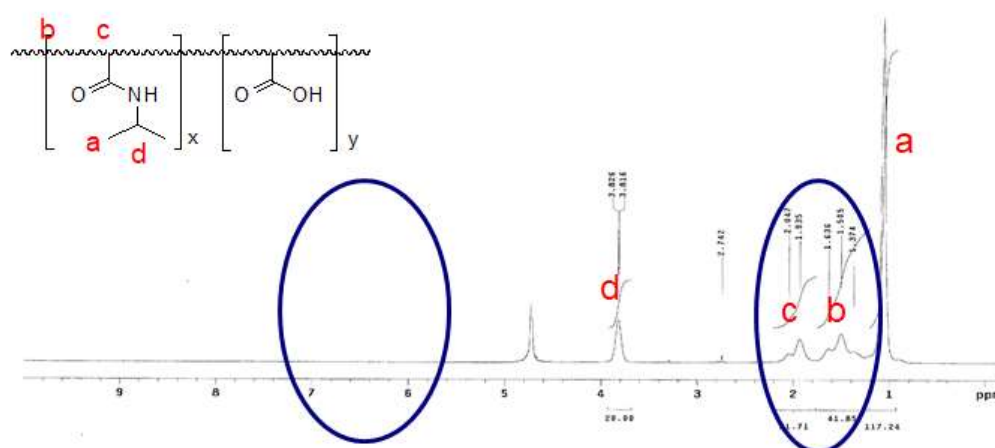

**Figure S3.**  $^1\text{H}$  spectrum of p(NiPAAm-co-MAA) = 97:3 (PNM97:3) copolymer were examined by NMR.

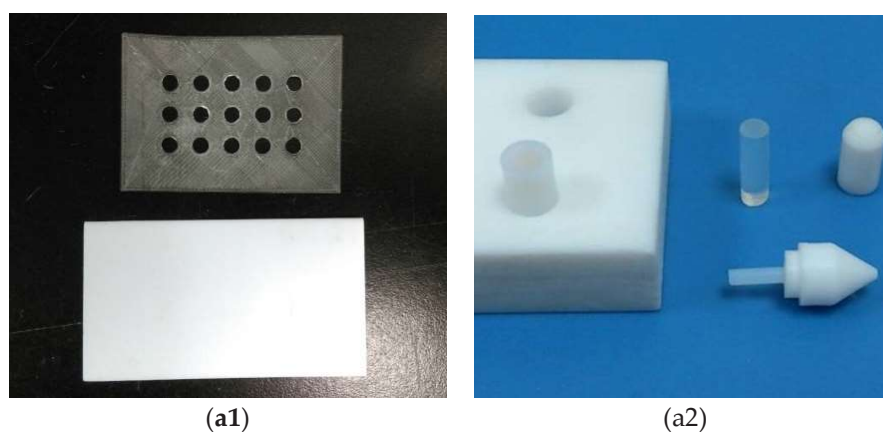

**Figure S4.** Two types of plastic molds for forming biphasic (hydroxyapatite and  $\beta$ -calcium phosphates) porous bone substitutes: a disk mold (**a1**,  $\phi$ 5 mm; h 0.7 mm) and hollow cylinder mold (**a2**,  $\phi_1$  3.5 mm;  $\phi_2$  1.5 mm; h 10 mm).

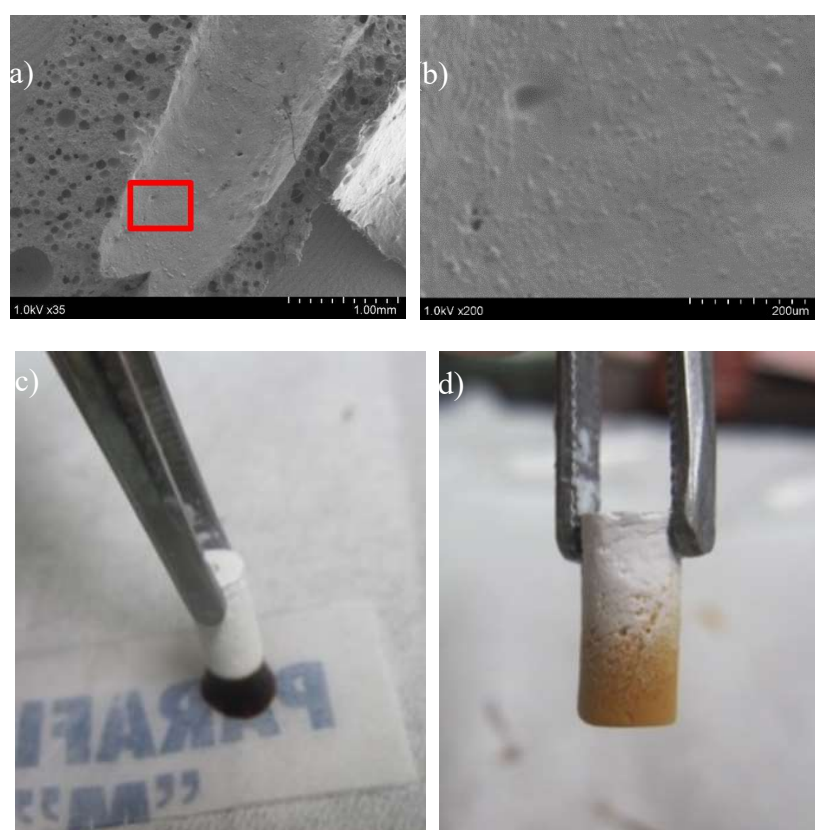

**Figure S5.** The SEM morphology of the SIM-PP NPs loaded within porous bioceramic of hollow cylinder after sintering at 1200 °C for 2h (**a,b**). The porous bioceramic of hollow cylinder absorb red ink to rise photos by liquid permeability test (**c,d**).

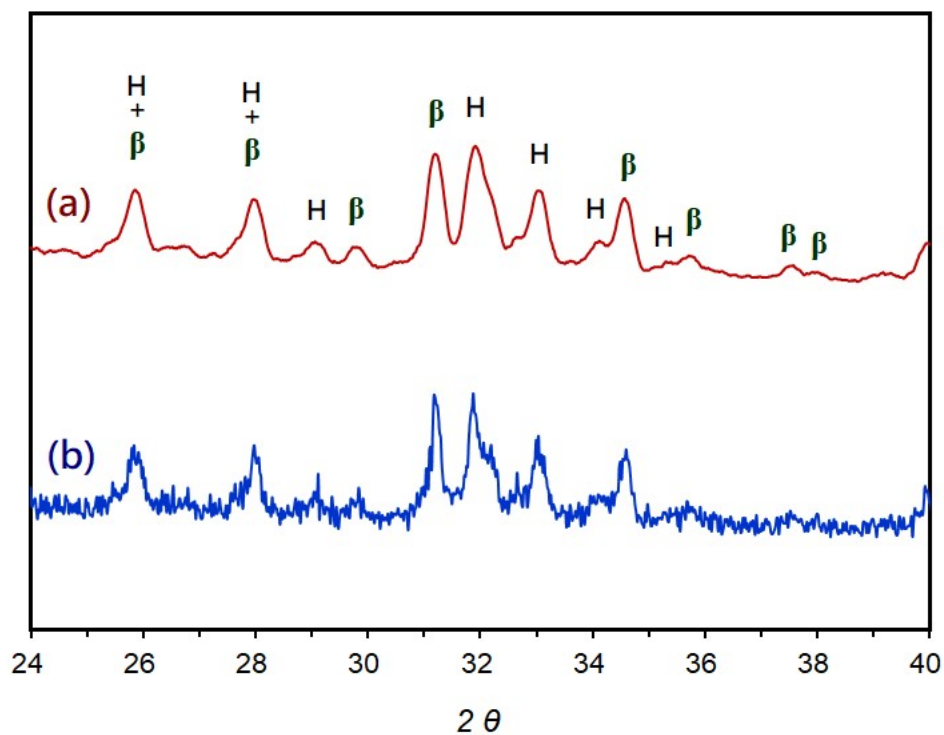

**Figure S6.** XRD patterns of the porous HAp/β-TCP (50/50) bioceramics after 1200 °C sintered for 2 h (a), commercial raw materials of HAp/β-TCP (b). ( $\beta$  = β-TCP, H = HAp).

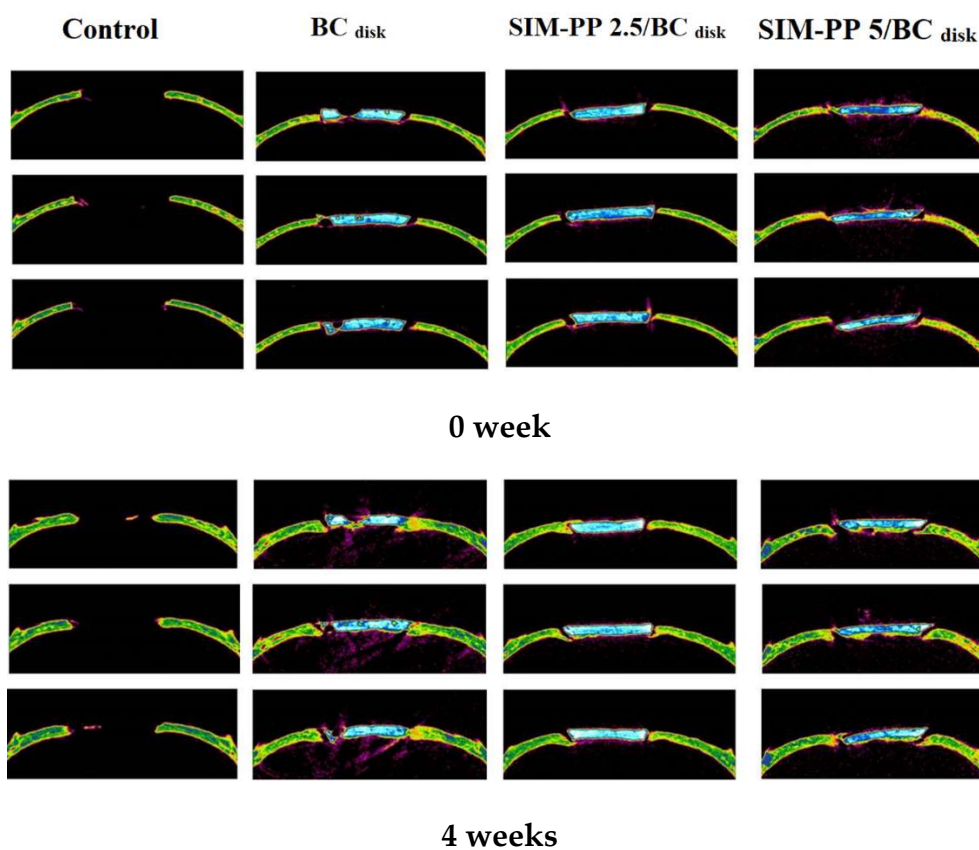

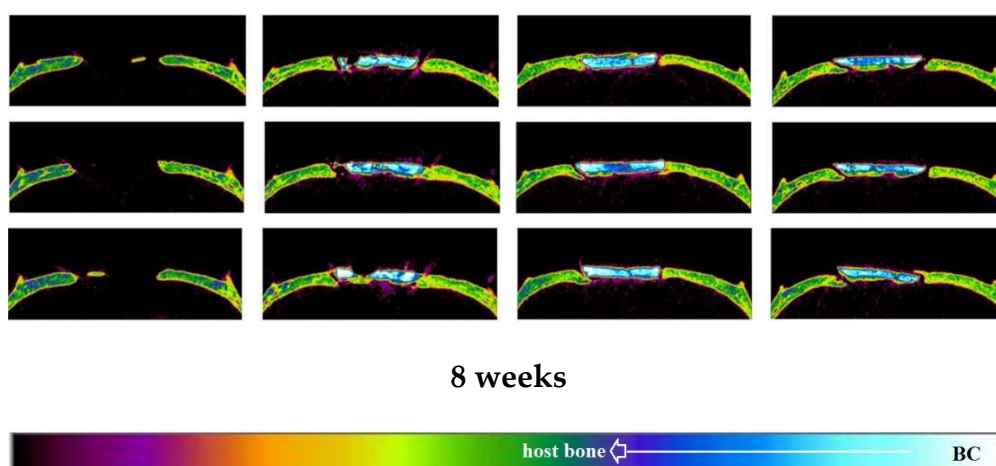

**Figure S7.** Cross-section slices of calvarial bone from the Hounsfield unit [HU] calibration of micro-CT images for the rat model at 8 weeks after implantation of BC<sub>disk</sub> samples ( $\phi$ 5 mm; h 0.7 mm), 2.5  $\mu$ mol of SIM in SIM-PP/BC<sub>disk</sub> samples and 5.0  $\mu$ mol of SIM in SIM-PP/BC<sub>disk</sub> samples. Notes: calvarial bone defects only were used as controls and the rat number is tree).
